# Supplementary material for: Glucocorticoids Inhibit Basal and Hormone-Induced Serotonin Synthesis in Pancreatic Beta Cells
Source: PLoS One. 2016 Feb 22;11(2):e0149343. doi: 10.1371/journal.pone.0149343 (PMC4763453; doi:10.1371/journal.pone.0149343)
Supplement: S1 Dataset — (XLSX) [file pone.0149343.s001.xlsx]

## Sheet: TPH activity
S1A_Tph activity in Min6 cells in the separate experiments.
Tph activity
fmoles/30 min/mg prot
Min6 cells + Dex + Prolactin
C1		1.21
C2		4.73
C3		5.22
C4		4.38
C5		3.85
C6		3.93
Dex1		1.21
Dex2		0.76
Dex3		0.84
Dex4		1.02
PRL1		7.29
PRL2		8.64
PRL3		6.88
PRL4		6.57
PRL5		13.72
PRL6		9.92
PRL+DEX1		4.14
PRL+DEX2		3.87
PRL+DEX3		4.43
PRL+DEX4		3.44
PRL+DEX5		3.84
PRL+DEX6		4.23
Min6 cells + Dex + Exendin
C1		4.66
C2		3.81
C3		4.18
C4		4.98
C5		3.12
C6		4.46
Dex1		0.91
Dex2		0.8
Dex3		0.81
Dex4		0.93
Dex5		0.83
Dex6		0.8
Exedin1		8.74
Exedin2		12.28
Exedin3		15.83
Exedin4		8.97
Exedin5		9.38
Exedin6		9.72
Exendin+DEX1		1.36
Exendin+DEX2		2.11
Exendin+DEX3		1.37
Exendin+DEX4		1.43
Exendin+DEX5		1.05
Exendin+DEX6		1.13

## Sheet: Serotonin content
S1B_Serotonin contents in Min6 cells and in islets in the separate experiments.
Serotonin measurement in isolated islets
Serotonin content fmole/islet
GRlox/lox	6.02
GRlox/lox	7.04
GRlox/lox	9.23
GRlox/lox+PdxCre	8243
GRlox/lox+PdxCre	4322.22
GRlox/lox+PdxCre	4741.02
GR+/+ PdxCre	61.26
GR+/+ PdxCre	143.82
GR+/+ PdxCre	102.5
Serotonin measurement in Min6 cells treated with Prolactin and Dex
Serotonin content	aM/cell
c1	1.84725
c2	1.57725
c3	1.83075
c4	1.614
Prolactin1	3.099
Prolactin2	2.3865
Prolactin3	3.009
Prolactin4	2.42025
Prolactin+Dex1	1.36725
Prolactin+Dex2	1.206
Prolactin+Dex3	1.1835
Prolactin+Dex4	1.20525
Dex1	1.03575
Dex2	0.88725
Dex3	0.99825
Dex4	0.8565
Serotonin measurement in Min6 cells treated with Exendin and Dex
Serotonin content	aM/cell
c1	3.22
c2	5.74
c3	6.18
c4	5.5
c5	6.42
Dex1	1.96
Dex2	2.9
Dex3	2.08
Dex4	1.42
Dex5	1.32
Dex6	1.68
Ex1	5.06
Ex2	6.94
Ex3	6.54
Ex4	7.78
Ex5	8.3
Dex+Ex1	1.42
Dex+Ex2	1.3
Dex+Ex3	1.02
Dex+Ex4	1.36
Dex+Ex5	1.86
Dex+Ex6	1.8
Sertonin measurement in isolated CD1 islets treated with Dex
	5-HT fmoles/100 islets
c1	10156.8
c2	6559.2
c3	9253.2
Dex1	5312.4
Dex2	3649.2
Dex3	4113.6
Serotonin content of islets from CORT, LIRA and CORT+LIRA treated mice
	5-HT fmoles/100 islets
Veh1	3990
Veh2	4200
Veh3	2902.5
Veh+Lira	6162
Veh+Lira	4866
Veh+Lira	5523
Cort1	903
Cort2	828
Cort3	324
Cort4	384
Cort5	693
Cort+Lira	3326.25
Cort+Lira	2373.75
Cort+Lira	2107.5

## Sheet: qPCR
S1C_Raw data of the qPCR performed for Tph1, Tph2 and 18S on cDNA from Min6 cells and isolated islets in the separate experiments.
qPCR for Tph1 with cDNA from Min6 cells treated with Dex and Exendin-4
	18s	Mean	tph1	Mean	dct	ddct	2-ddct
C1	15.3114	15.3114	32.886	32.7321	17.4206	0	1
			32.5781
C2	15.0752	15.0752	32.4469	32.5336	17.4585	0.0378761	0.974088
			32.6204
C3	14.9631	14.9391	32.017	31.908	16.9688	-0.451766	1.36771
	14.9151		31.7989
C4	15.7484	15.7387	32.5625	32.6635	16.9248	-0.495756	1.41006
	15.7289		32.7645
Dex1	14.9679	14.8558	32.8966	33.3598	18.5041	1.08347	0.471891
	14.7436		33.8231
Dex2	15.3302	15.2184	33.39	33.39	18.1716	0.750957	0.594209
	15.1066		35.572
Dex3	15.1489	15.2056	36.5271	34.8444	19.6388	2.21821	0.214909
	15.2624		34.8444
Ex1	15.3706	15.4981	32.5991	32.7746	17.2765	-0.144121	1.10506
	15.6256		32.9501
Ex2	15.631	15.6483	31.842	31.5477	15.8994	-1.52123	2.87036
	15.6656		31.2533
Ex3	15.9816	16.0306	32.6304	32.3579	16.3274	-1.09324	2.13353
	16.0795		32.0854
Ex4	15.7533	15.691	32.0701	32.061	16.37	-1.05058	2.07136
	15.6286		32.0519
Dex+Ex1	15.9992	15.9289	36.4339	34.9123	18.9833	1.56273	0.33851
	15.8587		34.9123
Dex+Ex2	15.7148	15.6233	33.8967	33.6732	18.0499	0.629326	0.646478
	15.5317		33.4497
Dex+Ex3	15.761	15.6472	34.0051	33.6347	17.9875	0.566864	0.675083
	15.5334		33.2642
Dex+Ex4	16.4738	16.3558	33.4624	33.4624	17.1066	-0.314006	1.24315
	16.2378		35.7092
qPCR for Tph2 with cDNA from Min6 cells treated with Dex and Exendin-4
	18s	Mean	Tph2	Mean	dct	ddct	2-ddct
C1	16.98	16.98	32.58	32.45	15.47	0	1.29684
			32.32
C2	15.45	15.45	32.15	32.325	16.875	1.03	0.48971
			32.5
C3	16.48	16.48	32.71	32.325	15.845	0	1
			31.94
C4	15.01	15.01	31.86	31.76	16.75	0.905	0.534033
			31.66
Dex1	15.51	15.51	32.99	32.595	17.085	1.24	0.423373
			32.2
Dex2	15.58	15.58	32.9	32.9	17.32	1.475	0.359733
			32.37
Dex3	15.5	15.5	32.79	32.22	16.72	0.875	0.545254
			32.22
Dex4	16.61	16.61	33.22	32.96	16.35	0.505	0.70466
			32.7
Ex1	17.75	17.75	33.08	33.375	15.625	-0.22	1.16473
			33.67
Ex2	17.7	17.7	32.72	32.645	14.945	-0.9	1.86607
			32.57
Ex3	17.66	17.66	33.85	33.94	16.28	0.435	0.739694
			34.03
Ex4	17.67	17.67	32.76	32.735	15.065	-0.78	1.71713
			32.71
Dex+Ex1	17.59	17.59	33.92	33.92	16.33	0.485	0.714497
Dex+Ex2	17.27	17.27	33.7	34.07	16.8	0.955	0.515842
			34.44
Dex+Ex3	16.85	16.85	33.38	33.23	16.38	0.535	0.690159
			33.08
Dex+Ex4	18.13	18.13	35.36	35.36	17.23	0.265	0.832199
qPCR for Tph1 with cDNA from Min6 cells treated with Dex and Exendin-4
C1	139.1	126.9	1.09614	1.10035
	147.9	133.9	1.10456
C2	137.4	100.1	1.37263	1.31815
	152.4	120.6	1.26368
C3	69.64	60.34	1.15413	1.01479
	56.44	64.47	0.875446
C4	168.1	77.59	2.16652	1.35117
	161.6	119.6	1.35117
D1	23.39	78.11	0.299449	0.268288
	20.63	87	0.237126
D2	46.44	109.7	0.423336	0.516691
	46.15	75.65	0.610046
D3	79.17	100.3	0.789332	0.72675
	77.11	116.1	0.664169
D4	65.54	94.08	0.696641	0.698709
	60.47	86.29	0.700776
PRL	477.1	153.5	3.10814	3.10959
	484.7	155.8	3.11104
PRL	496.9	154.7	3.21202	2.97668
	482.2	175.9	2.74133
PRL	459.4	196.8	2.33435	2.36278
	418.7	175.1	2.39121
Dex+PRL	123.6	130.5	0.947126	0.95897
	126.4	130.2	0.970814
Dex+PRL	203.2	181.6	1.11894	1.16598
	199.3	164.3	1.21302
Dex+PRL	171.3	135.7	1.26234	1.09566
	133.4	143.6	0.928969
Dex+PRL	179.2	129.1	1.38807	1.38807
	185.3	98.98	1.8721
qPCR for Tph2 with cDNA from Min6 cells treated with Dex and Exendin-4
C1	103	133	0.774436	0.883218
	124	125	0.992
C2	125	120	1.04167	1.18601
	149	112	1.33036
C3	56	37	1.51351	1.51351
	56.4	0.207	272.464
C4	114	70.3	1.62162	1.62162
	137	32.6	4.20245
D1	28.7	76.9	0.373212	0.279564
	13.2	71	0.185915
D2	52.4	111	0.472072	0.482114
	50.2	102	0.492157
D3	81.7	114	0.716667	0.716667
	102	108	0.944444
D4	46.2	84.7	0.545455	0.636917
	59.8	82.1	0.72838
PRL	422	144	2.93056	3.23528
	531	150	3.54
PRL	342	113	3.02655	3.91024
	442	92.2	4.79393
PRL	309	121	2.55372	2.97365
	338	99.6	3.39357
PRL	250	105	2.38095	3.04413
	456	123	3.70732
Dex+PRL	160	124	1.29032	1.36738
	169	117	1.44444
Dex+PRL	196	178	1.10112	1.3274
	275	177	1.55367
Dex+PRL	258	143	1.8042	1.88194
	243	124	1.95968
Dex+PRL	191	106	1.80189	1.78626
	193	109	1.77064
qPCR for Tph1 with cDNA from islets isolated from wild type CD1 mice and treated with Dex
	Tph1	18S	Tph1/18S	Mean
C1	0.7307	27.29	0.0267754	0.0176928
	0.2658	30.87	0.0086103
C2	2.57	171.3	0.0150029	0.0120297
	1.747	192.9	0.00905651
C3	3.624	318.1	0.0113926	0.011477
	4.065	351.6	0.0115614
Dex1	0.032563	5.124	0.006355	0.00591254
	0.0310414	5.557	0.005586
Dex2	0.08049	92.88	0.000866602	0.00565358
	0.9906	94.88	0.0104406
Dex3	0.04408	5.925	0.00743966	0.00692353
	0.04127	6.441	0.00640739
Dex4	0.2697	41.26	0.0065366	0.00463398
	0.1151	42.14	0.00273137
qPCR for Tph2 with cDNA from islets isolated from wild type CD1 mice and treated with Dex
	Tph2	18S	Tph2/18S	Mean
C1	6.443	419.8	0.0153478	0.0194488
	8.193	347.9	0.0235499
C2	0.1527	5.925	0.0257722	0.022543
	0.1244	6.441	0.0193138
C3	1.201	41.26	0.0291081	0.0293618
	1.248	42.14	0.0296156
Dex1	0.7307	27.29	0.0267754	0.0176928
	0.2658	30.87	0.0086103
Dex2	0.08049	92.88	0.000866602	0.00565358
	0.9906	94.88	0.0104406
Dex3	2.57	171.3	0.0150029	0.0120297
	1.747	192.9	0.00905651
Dex4	3.624	318.1	0.0113926	0.011477
	4.065	351.6	0.0115614
qPCR for Tph1 with cDNA from islets isolated from Grlox/lox PdxCre mice and GR+/+ PdxCre mice
	18S	Tph1	dct	ddct	TPH1
GR +/+ PdxCre1	16.0572	29.0539	12.9967	0.493501	0.710299
GR +/+ PdxCre2	14.5568	26.4313	11.8745	-0.628651	1.54612
GR +/+ PdxCre3	15.6963	28.3346	12.6383	0.135149	0.910575
Grlox/lox PdxCre1	10.855	21.275	10.42	-2.0832	4.23746
Grlox/lox PdxCre2	10.995	19.685	8.69	-3.8132	14.0568
Grlox/lox PdxCre3	10.26	21.13	10.87	-1.6332	3.102
Grlox/lox PdxCre4	10.44	19.53	9.09	-3.4132	10.6531
Grlox/lox PdxCre5	10.59	21.03	10.44	-2.0632	4.17912
qPCR for Tph1 with cDNA from islets isolated from Grlox/lox PdxCre mice and GR+/+ PdxCre mice
	18S	Tph1	dct	ddct	TPH1
GR +/+ PdxCre1	16.0572	32.1846	16.1274	0.0394983	0.972993
GR +/+ PdxCre2	14.5568	31.0966	16.5399	0.451995	0.731031
GR +/+ PdxCre3	15.6963	31.2927	15.5964	-0.491493	1.4059
Grlox/lox PdxCre1	10.855	25.74	14.885	-1.20289	2.30201
Grlox/lox PdxCre2	10.995	25.01	14.015	-2.07289	4.20729
Grlox/lox PdxCre3	11.095	25.335	14.24	-1.84789	3.59974
Grlox/lox PdxCre4	10.26	24.99	14.73	-1.35789	2.5631
Grlox/lox PdxCre5	10.44	25.06	14.62	-1.46789	2.76617
Grlox/lox PdxCre6	10.59	24.88	14.29	-1.79789	3.47712
qPCR for Tph1 in Min6 cells treated with Dex
	Tph1	18s
C	5812	99.32	58.5179	52.4759
	5651	121.7	46.4339
C	7034	112.1	62.7475	83.0963
	11410	110.3	103.445
C	16440	180.1	91.2826	78.0255
	10350	159.8	64.7685
C	7464	156.8	47.602	71.689
	6190	64.63	95.776
C	6980	91.49	76.2925	94.6989
	10650	94.16	113.105
Dex	6681	121.4	55.0329	42.9359
	3235	104.9	30.8389
Dex	5220	189.4	27.5607	30.5099
	4256	127.2	33.4591
Dex	7045	208	33.8702	57.3226
	6525	80.78	80.7749
Dex	5684	115.3	49.2975	49.2975
	13970	122.3	114.227
Dex	7161	112.8	63.484	63.484
	8308	82.1	101.194
qPCR for Tph2 in Min6 cells treated with Dex
	Tph2
C	311.3	99.32	3.13431	2.82024
	305	121.7	2.50616
C	305.7	112.1	2.72703	2.63595
	280.7	110.3	2.54488
C	518.2	180.1	2.87729	2.87263
	458.3	159.8	2.86796
C	290.1	156.8	1.85013	3.41617
	322	64.63	4.98221
C	500.3	91.49	5.46836	4.53006
	338.2	94.16	3.59176
Dex	285.3	121.4	2.35008	2.45864
	269.3	104.9	2.56721
Dex	220.1	189.4	1.16209	1.29999
	182.9	127.2	1.43789
Dex	383.3	208	1.84279	2.61179
	273.1	80.78	3.38079
Dex	216.7	115.3	1.87944	2.24512
	319.3	122.3	2.61079
Dex	282	112.8	2.5	2.23477
	161.7	82.1	1.96955

## Sheet: WB
S1D_Western Blots and blot quantification for Tph1 and actin using proteins from Min6 cells in the separate experiments.
Western Blot for Tph1 in Min6 cells in C, Dex, Prolactin and Prolactin+Dex conditions
	C	PROLACTIN		DEX	DEX+PROLACTIN
							Tph1
							Actin
Blot quantification using ImageJ
		TPH1	Actin
C	1	3252.5	836.335	3.88899
	2	4326.91	1386.11	3.12162
	3	3425.03	1215.87	2.81694
PRL	4	5277.2	1299.46	4.06109
	5	5787.98	957.284	6.04625
	6	4144.26	1010	4.10322
Dex	7	3893.26	1650	2.35955
	8	3321.43	2733.58	1.21505
	9	2942.89	1670.11	1.76209
Dex PRL	10	4608.38	1500	3.07225
	11	2940.67	2564.87	1.14652
	12	2193.72	1353.28	1.62103
Western Blot for Tph1 in Min6 cells in C, Dex, Exedin-4 and Exendin-4+Dex conditions
	C	DEX	Ex-4+DEX		Ex-4
Blot quantification using ImageJ
	Tph1		Actin
C	3261.11	1	2063.8	1.58015
C	3468.94	2	2255.51	1.53799
C	2648.82	3	1956.68	1.35373
Dex	1689.16	4	1802.97	0.936878
Dex	1868.16	5	2221.09	0.841101
Dex	2274.28	6	2473.51	0.919458
Dex+Ex-4	3070.65	7	2641.21	1.16259
Dex+Ex-4	3021.7	8	2897.46	1.04288
Dex+Ex-4	3506.7	9	2827.75	1.2401
Ex-4	4954.89	10	2522.34	1.96441
Ex-4	5063.48	11	2783.75	1.81894
Ex-4	4438.35	12	2154.46	2.06008
